# Supplementary material
Source: publisher figshare collection journal article supplement (https://tandf.figshare.com/articles/dataset/_/8094737)
Supplement: Supplementary file 1 [file 1]

## Supplementary table I: Overview of worst recorded side effects

| SIDE EFFECTS | GRADE 1-2 | ≥GRADE 3 |
| --- | --- | --- |
| RIBP |  |  |
| Sensory/motor alterations | 1 | 2 |
| Pain in ispilat. upper extremity | 4 | 2 |
| Other side effects |  |  |
| Rupture of the supraspinatus tendon | - | 1 |
| Pain in thorax | 8 | 2 |
| Pneumonitis | 8 | - |
| Lung infection | 5 | - |
| Cough | 2 | - |
| Rib fracture | 3 | - |
| COPD-exacerbation | 1 | 3 |
| Dyspnea | 1 | 2 |
| Heart failure | - | 2 |
| Fever and chills | 1 | - |
| Hoarsness | 1 | - |
| Dizziness | 1 | - |
